# Supplementary material for: Donor-Recipient Weight Match in Pediatric Heart Transplantation: Liberalizing Weight Matching with Caution
Source: MDPI journal article supplement (doi:10.3390/jcdd9050148), 2022-05-07
Supplement: s1 [file s1]

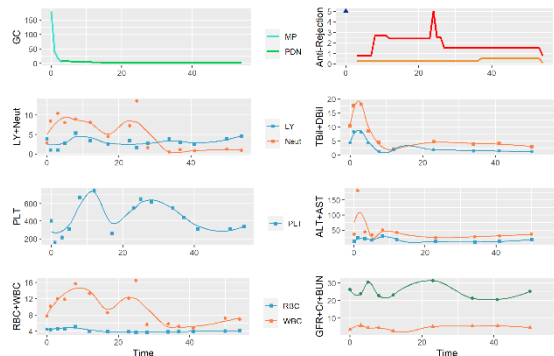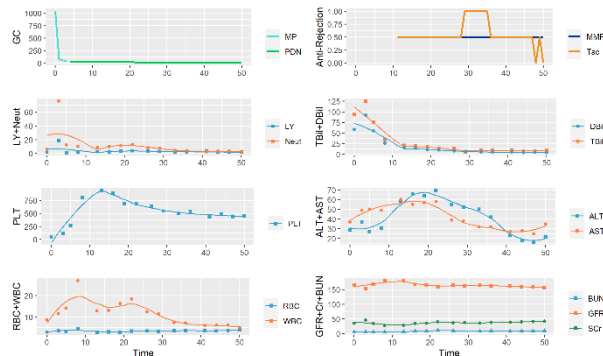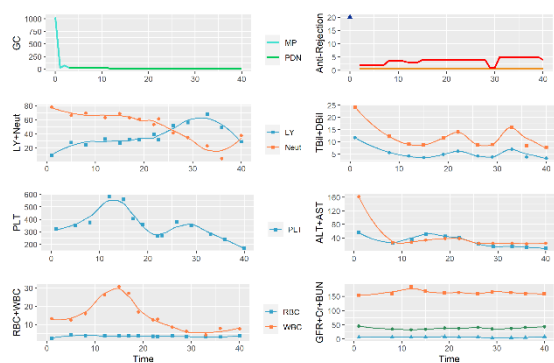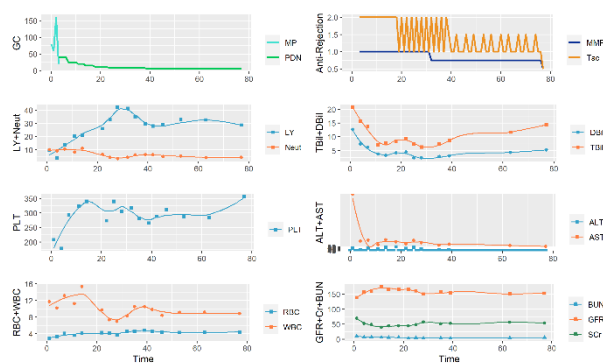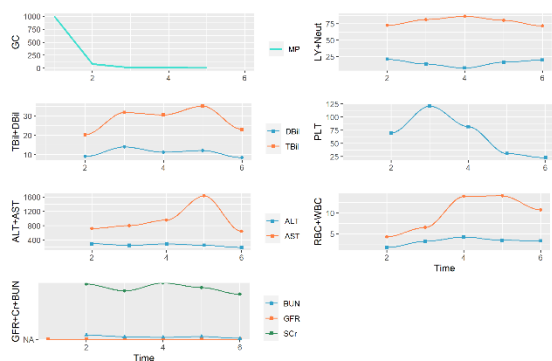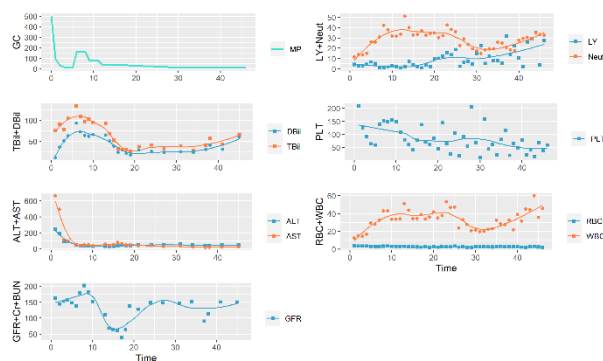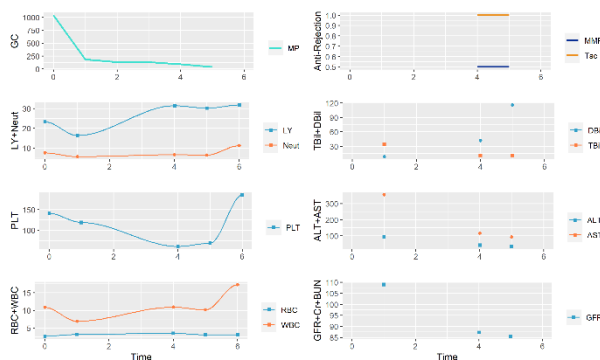

**Figure S1. Hematologic data and the use of anti-rejection drugs of the seven patients with DRWR>200% after HTx.**

RBC, red blood cell; PLT, platelet; WBC, white blood cell; Neut, neutrophils; Lym, lymphocyte; ALT, alanine aminotransferase; AST, aspartate aminotransferase; Tbil, total bilirubin; SCr, serum creatinine; BUN, blood urea nitrogen.
